# Supplementary material
Source: PubMed Central journal article supplement (PMC3963402)
Supplement: NIHMS556018-supplement-01.pdf [file NIHMS556018-supplement-01.pdf]

Supplementary Table 1. List of compounds evaluated as potential interferences.

|                      |                                       |                                  |                                                    |
|----------------------|---------------------------------------|----------------------------------|----------------------------------------------------|
| aspirin              | dextromethorphan                      | ecgonine                         | noroxymorphone                                     |
| caffeine             | phentermine                           | anhydroecgonine methyl ester     | amphetamine                                        |
| ibuprofen            | pseudoephedrine                       | cocaethylene                     | methamphetamine                                    |
| acetaminophen        | ephedrine                             | norcocaethylene                  | 3,4-methylenedioxy-methamphetamine                 |
| pentazocine          | ketamine                              | <i>m</i> -hydroxycocaine         | 3,4-methylenedioxy-ethylamphetamine                |
| diphenhydramine      | phenylpropanolamine                   | <i>p</i> -hydroxycocaine         | 3,4-methylenedioxy-amphetamine                     |
| brompheniramine      | fenfluramine                          | <i>m</i> -hydroxybenzoylecgonine | 4-hydroxy-3-methoxy-methamphetamine                |
| chlorpheniramine     | nicotine                              | <i>p</i> -hydroxybenzoylecgonine | 4-hydroxy-3-methoxy-amphetamine                    |
| imipramine           | cotinine                              | morphine                         | <i>p</i> -methoxy-methamphetamine                  |
| clomipramine         | <i>trans</i> -3'-hydroxycotinine      | normorphine                      | <i>p</i> -methoxy-amphetamine                      |
| clonidine            | norcotinine                           | codeine                          | <i>p</i> -hydroxy-methamphetamine                  |
| fluoxetine           | $\Delta$ 9-tetrahydrocannabinol (THC) | norcodeine                       | propoxyphene                                       |
| norfluoxetine        | 11-hydroxy-THC                        | 6-acetylmorphine                 | 3,4-methylenedioxyphenyl-2-butanamine              |
| parexetine           | 11-nor-9-carboxy-THC                  | 6-acetylcodeine                  | N-methyl-1-(3,4-methylenedioxyphenyl)-2-butylamine |
| nitrazepam           | cannabidiol                           | buprenorphine                    | cathinone                                          |
| flunitrazepam        | cocaine                               | norbuprenorphine                 | 4-bromo-2,5-dimethoxyphenethylamine                |
| temazepam            | benzoylecgonine                       | hydrocodone                      | phencyclidine                                      |
| nordiazepam          | norcocaine                            | hydromorphone                    | 11-nor-9-carboxy-THC-glucuronide                   |
| 7-aminoclonazepam    | norbenzoylecgonine                    | oxycodone                        | morphine-3-beta-D-glucuronide                      |
| 7-aminoflunitrazepam | ecgonine ethyl ester                  | noroxycodone                     | morphine-6-beta-D-glucuronide                      |
| 7-aminonitrazepam    | ecgonine methyl ester                 | oxymorphone                      |                                                    |

Supplemental Table 2. Mean extraction efficiencies and matrix effects for synthetic cannabinoids and metabolites extracted from urine by Resprep C18, Strata C8 and supported-liquid extraction (SLE).

| <b>Analyte</b>            | % Extraction efficiency (% Matrix Effect), N=3 |                  |              |
|---------------------------|------------------------------------------------|------------------|--------------|
|                           | <b>Resprep C18</b>                             | <b>Strata C8</b> | <b>SLE</b>   |
| JWH-018                   | 19.9 (1.6)                                     | 27.2 (-14.0)     | 61.3 (-8.5)  |
| RCS8                      | 18.5 (1.7)                                     | 27.3 (-12.3)     | 68.2 (-12.1) |
| JWH-250 N-5-hydroxypentyl | 83.1 (6.0)                                     | 85.5 (1.7)       | 103.3 (4.5)  |
| JWH-250 N-5-carboxypentyl | 87.7 (1.6)                                     | 98.7 (-14.2)     | 87.1 (0.4)   |

All analyte concentrations were 1 µg/l
